# Supplementary material for: Epidemiology of Myocarditis and Pericarditis Following mRNA Vaccination by Vaccine Product, Schedule, and Interdose Interval Among Adolescents and Adults in Ontario, Canada
Source: PubMed Central journal article supplement (PMC9233237; doi:10.1001/jamanetworkopen.2022.18505), 2022-06-24
Supplement: jamanetwopen-e2218505-s001.pdf [file jamanetwopen-e2218505-s001.pdf]

## Supplementary Online Content

Buchan SA, Seo CY, Johnson C, et al. Epidemiology of myocarditis and pericarditis following mRNA vaccination by vaccine product, schedule, and interdose interval among adolescents and adults in Ontario, Canada. *JAMA Netw Open*. 2022;5(6):e2218505. doi:10.1001/jamanetworkopen.2022.18505

**eFigure 1.** Number of COVID-19 mRNA Vaccine Doses Administered in Ontario by Dose Number and Vaccine Product and Overview of Vaccine Program Changes

**eFigure 2.** Myocarditis and Pericarditis Reports Following COVID-19 mRNA Vaccines by Dose Number and Time to Symptom Onset

**eTable 1.** Clinical Diagnosis and Severity of Myocarditis and Pericarditis

**eTable 2.** Crude Rate of Reported Myocarditis Meeting BC Level 1 and 2 Only per Million Doses Administered and 95% CI by Vaccine Product, Dose Number, Age, and Sex: Series Initiated on or After June 1, 2021

**eTable 3.** Crude Rate of Reported Myocarditis and Pericarditis per Million Doses Administered and 95% CI by Vaccine Product, Dose Number, Age, and Sex: Series Initiated on or After December 14, 2020

**eFigure 3.** Rate of Reported Myocarditis and Pericarditis per Million Doses Administered and 95% CI Following Dose 2 of mRNA Vaccine for All Sexes in Ontario as of September 4, 2021

**eTable 4.** Rate of Reported Myocarditis and Pericarditis per Million Doses Administered and 95% CI by Dose 2 Product and Iddose Interval, for Individuals Receiving Dose 2 on or After June 1, 2021

**eTable 5.** Rates of Reported Myocarditis and Pericarditis per Million Doses Administered and 95% CI Among Males Aged 18-24 Years by Vaccine Product and Iddose Interval With Dose 2 on or After June 1, 2021

This supplementary material has been provided by the authors to give readers additional information about their work.

**eFigure 1.** Number of COVID-19 mRNA vaccine doses administered in Ontario by dose number and vaccine product and overview of vaccine program changes

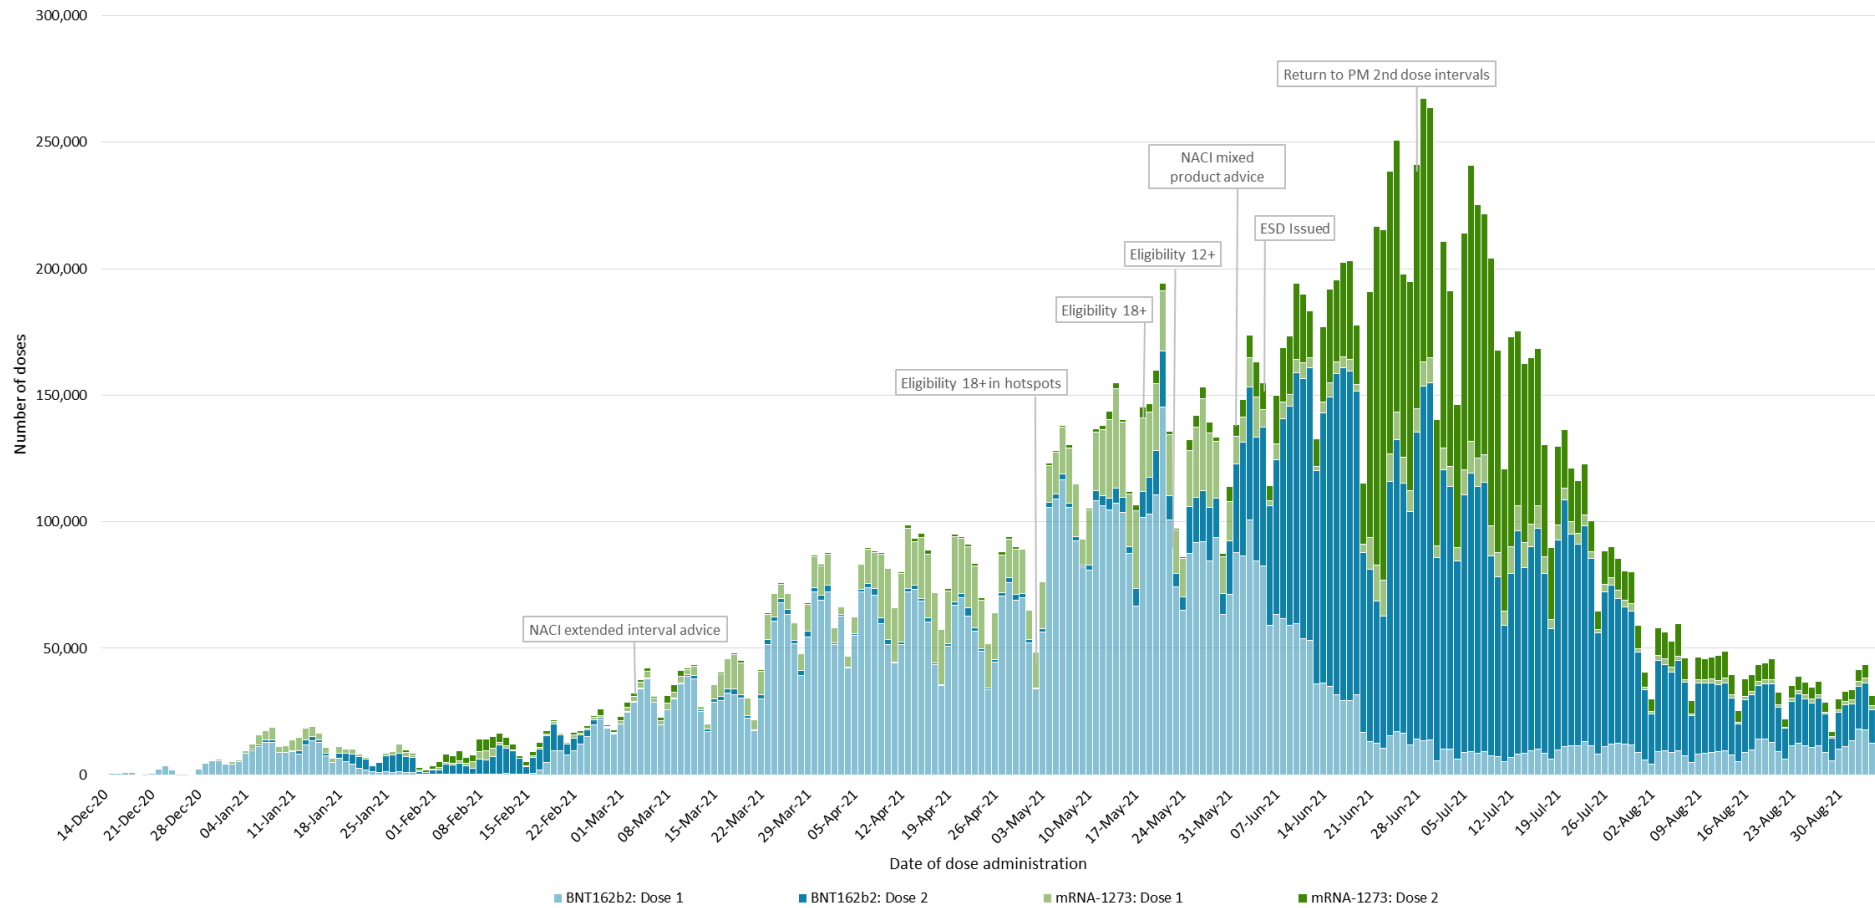

NACI: National Advisory Committee on Immunization; ESD: Enhanced Surveillance Directive; PM: Product Monograph

**eFigure 2.** Myocarditis and pericarditis reports following COVID-19 mRNA vaccines by dose number and time to symptom onset<sup>a</sup>

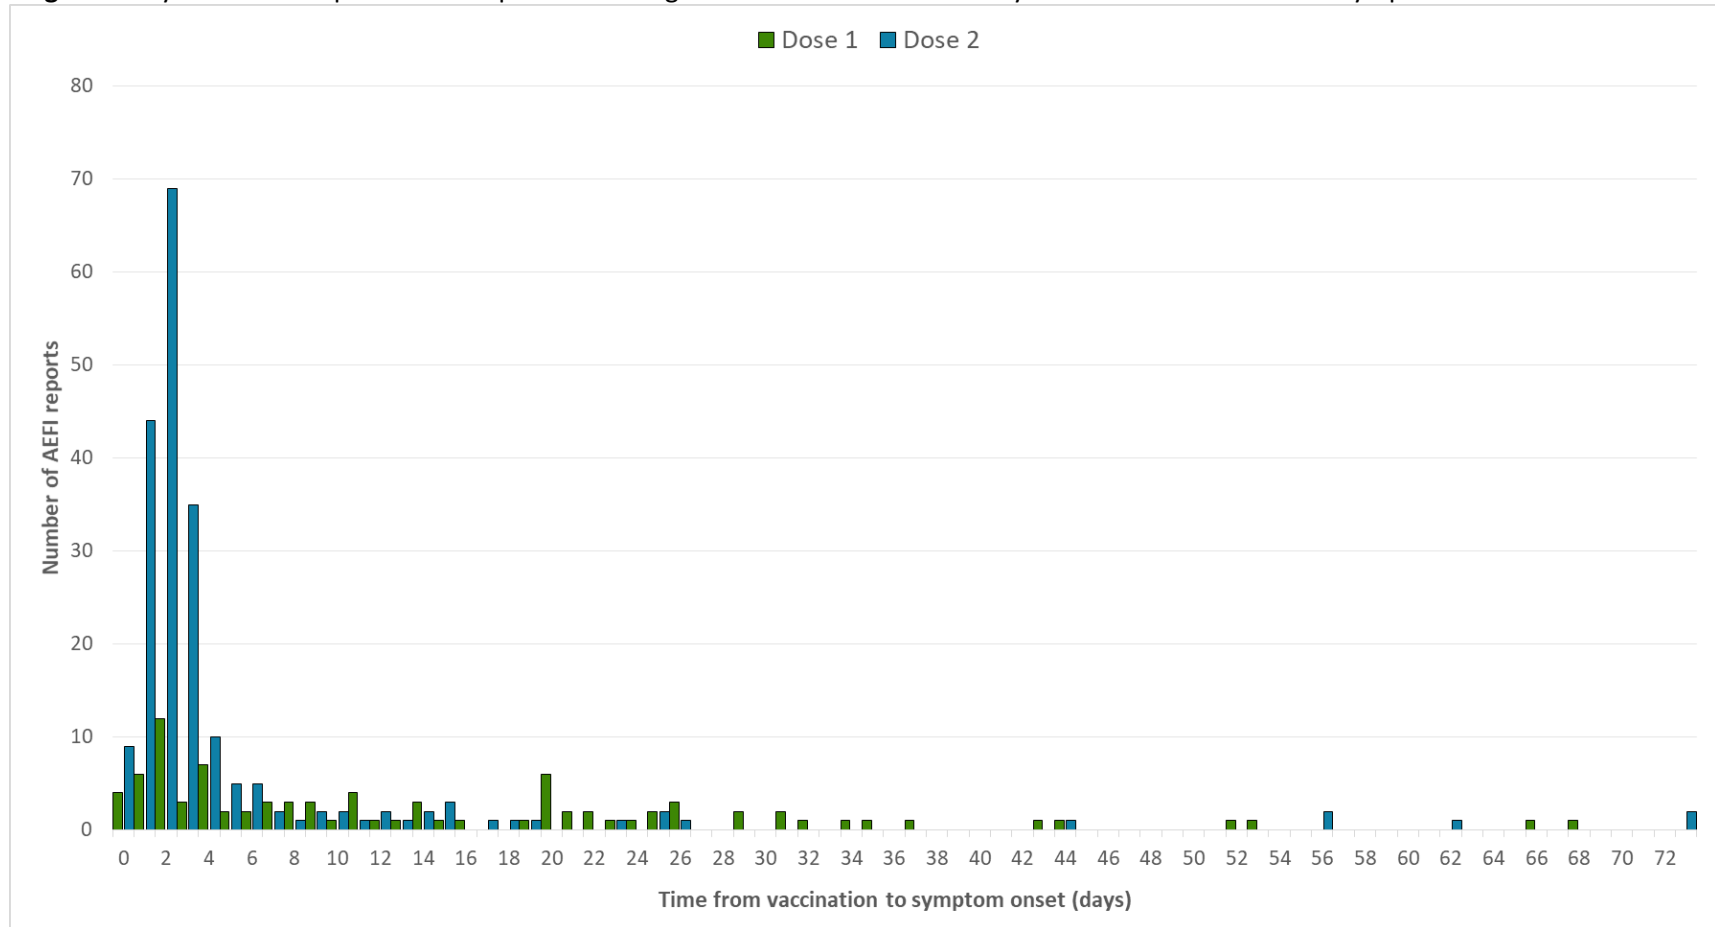

<sup>a</sup>2 reports with unknown time to onset were excluded from this figure

**eTable 1.** Clinical diagnosis and severity of myocarditis and pericarditis

|                                           | <b>Myocarditis<br/>(n=105)</b> | <b>Pericarditis (n=85)</b> | <b>Myopericarditis<sup>a</sup><br/>(n=107)</b> | <b>Total (N=297)</b> |
|-------------------------------------------|--------------------------------|----------------------------|------------------------------------------------|----------------------|
| <b>Age group (years)</b>                  |                                |                            |                                                |                      |
| 12-17                                     | 28 (26.7%)                     | 8 (9.4%)                   | 19 (17.8%)                                     | 55 (18.5%)           |
| 18-24                                     | 30 (28.6%)                     | 16 (18.8%)                 | 50 (46.7%)                                     | 96 (32.3%)           |
| 25-39                                     | 30 (28.6%)                     | 12 (14.1%)                 | 30 (28.0%)                                     | 72 (24.2%)           |
| ≥40                                       | 17 (16.2%)                     | 49 (57.6%)                 | 8 (7.5%)                                       | 74 (24.9%)           |
| <b>Healthcare<br/>utilization/outcome</b> |                                |                            |                                                |                      |
| Emergency<br>department                   | 101 (96.2%)                    | 83 (97.6%)                 | 106 (99.1%)                                    | 290 (97.6%)          |
| In-patient<br>hospitalization             | 87 (82.9%)                     | 33 (38.8%)                 | 90 (84.1%)                                     | 210 (70.7%)          |
| Intensive care unit<br>admission          | 5 (4.8%)                       | 5 (5.9%)                   | 4 (3.7%)                                       | 14 (4.7%)            |
| Death                                     | 0                              | 0                          | 0                                              | 0                    |
| <b>BC level</b>                           |                                |                            |                                                |                      |
| 1                                         | 34 (32.4%)                     | 5 (5.9%)                   | 28 (26.2%)                                     | 67 (22.6%)           |
| 2                                         | 68 (64.8%)                     | 73 (85.9%)                 | 79 (73.8%)                                     | 220 (74.1%)          |
| 3                                         | 3 (2.9%)                       | 7 (8.2%)                   | 0 (0.0%)                                       | 10 (3.4%)            |

<sup>a</sup>Myopericarditis reports were assessed against Brighton Collaboration (BC) case definitions for myocarditis and pericarditis. The highest level of certainty was assigned to the report (e.g., if a report met level 1 for myocarditis and level 3 for pericarditis, it was assigned as level 1).

**eTable 2.** Crude rate<sup>a</sup> of reported myocarditis meeting BC level 1 and 2 only per million doses administered and 95% CI by vaccine product, dose number, age, and sex: series initiated on or after June 1, 2021

| <b>BNT162b2</b>          |                    |                       |                  |                     |                    |                       |
|--------------------------|--------------------|-----------------------|------------------|---------------------|--------------------|-----------------------|
|                          | All                |                       | Female           |                     | Male               |                       |
| <b>Age group (years)</b> | Dose 1             | Dose 2                | Dose 1           | Dose 2              | Dose 1             | Dose 2                |
| <b>12-17</b>             | 21.5 (10.7 - 38.4) | 49.7 (30.8 - 76.0)    | 8.1 (1.0 - 29.1) | 9.7 (1.2 - 35.1)    | 34.2 (15.6 - 64.9) | 88.1 (53.0 - 137.5)   |
| <b>18-24</b>             | 10.7 (2.2 - 31.3)  | 19.0 (3.9 - 55.5)     | 7.9 (0.2 - 44.1) | NR                  | 13.1 (1.6 - 47.3)  | 35.5 (7.3 - 103.7)    |
| <b>25-39</b>             | 9.3 (3.0 - 21.7)   | 12.8 (3.5 - 32.9)     | NR               | 13.1 (1.6 - 47.5)   | 17.9 (5.8 - 41.8)  | 12.6 (1.5 - 45.4)     |
| <b>≥40</b>               | NR                 | NR                    | NR               | NR                  | NR                 | NR                    |
| <b>Total</b>             | 10.2 (6.1 - 15.9)  | 23.2 (15.4 - 33.5)    | 3.4 (0.7 - 9.8)  | 6.8 (1.9 - 17.4)    | 16.6 (9.5 - 27.0)  | 38.8 (24.9 - 57.8)    |
| <b>mRNA-1273</b>         |                    |                       |                  |                     |                    |                       |
|                          | All                |                       | Female           |                     | Male               |                       |
| <b>Age group (years)</b> | Dose 1             | Dose 2                | Dose 1           | Dose 2              | Dose 1             | Dose 2                |
| <b>12-17<sup>b</sup></b> | NA                 | NA                    | NA               | NA                  | NA                 | NA                    |
| <b>18-24</b>             | NR                 | 195.5 (117.7 - 305.3) | NR               | 69.1 (14.2 - 201.9) | NR                 | 299.5 (171.2 - 486.4) |
| <b>25-39</b>             | 16.2 (3.3 - 47.3)  | 48.9 (23.5 - 90.0)    | NR               | 21.5 (2.6 - 77.7)   | 28.8 (5.9 - 84.3)  | 72.1 (31.1 - 142.0)   |
| <b>≥40</b>               | 10.0 (1.2 - 36.1)  | NR                    | NR               | NR                  | 18.3 (2.2 - 66.2)  | NR                    |
| <b>Total</b>             | 10.4 (3.4 - 24.4)  | 58.4 (39.1 - 83.9)    | NR               | 22.0 (7.1 - 51.4)   | 18.7 (6.1 - 43.7)  | 89.4 (57.3 - 133.0)   |

<sup>a</sup>Estimates were not provided for strata with 0 reported events. <sup>b</sup>Estimates for mRNA-1273 were not provided for individuals aged 12-17 because this product was not used for this age group in Ontario. NA, not applicable; NR, not reported.

**eTable 3.** Crude rate of reported myocarditis and pericarditis per million doses administered and 95% CI by vaccine product, dose number, age, and sex: series initiated on or after December 14, 2020

| <b>BNT162b2</b>          |                    |                       |                   |                    |                    |                       |
|--------------------------|--------------------|-----------------------|-------------------|--------------------|--------------------|-----------------------|
|                          | All                |                       | Female            |                    | Male               |                       |
| <b>Age group (years)</b> | Dose 1             | Dose 2                | Dose 1            | Dose 2             | Dose 1             | Dose 2                |
| <b>12-17</b>             | 24.7 (14.9 - 38.6) | 53.6 (37.5 - 74.2)    | 15.9 (5.8 - 34.6) | 12.0 (3.3 - 30.8)  | 33.4 (17.8 - 57.0) | 94.5 (64.6 - 133.4)   |
| <b>18-24</b>             | 18.8 (10.5 - 31.1) | 24.3 (13.0 - 41.6)    | 7.5 (1.5 - 21.8)  | 7.2 (0.9 - 25.9)   | 30.6 (15.8 - 53.5) | 43.4 (21.7 - 77.6)    |
| <b>25-39</b>             | 8.2 (4.6 - 13.4)   | 13.2 (7.7 - 21.2)     | 5.3 (1.7 - 12.3)  | 11.7 (5.0 - 23.0)  | 11.3 (5.4 - 20.7)  | 15.0 (6.9 - 28.5)     |
| <b>≥40</b>               | 4.2 (2.5 - 6.5)    | 6.4 (4.2 - 9.5)       | 2.0 (0.7 - 4.7)   | 4.7 (2.3 - 8.7)    | 6.8 (3.7 - 11.3)   | 8.5 (4.8 - 14.1)      |
| <b>Total</b>             | 8.5 (6.6 - 10.8)   | 14.3 (11.5 - 17.5)    | 4.5 (2.7 - 7.1)   | 7.0 (4.5 - 10.5)   | 13.1 (9.7 - 17.3)  | 22.7 (17.6 - 28.8)    |
| <b>mRNA-1273</b>         |                    |                       |                   |                    |                    |                       |
|                          | All                |                       | Female            |                    | Male               |                       |
| <b>Age group (years)</b> | Dose 1             | Dose 2                | Dose 1            | Dose 2             | Dose 1             | Dose 2                |
| <b>12-17<sup>b</sup></b> | NA                 | NA                    | NA                | NA                 | NA                 | NA                    |
| <b>18-24</b>             | 16.2 (4.4 - 41.4)  | 177.8 (136.9 - 227.1) | 17.4 (2.1 - 63.0) | 45.7 (19.7 - 90.0) | 15.2 (1.8 - 54.8)  | 305.2 (230.6 - 396.4) |
| <b>25-39</b>             | 10.5 (3.9 - 22.9)  | 39.1 (27.1 - 54.6)    | 7.5 (0.9 - 27.1)  | 12.1 (3.9 - 28.2)  | 13.3 (3.6 - 33.9)  | 63.9 (42.8 - 91.8)    |
| <b>≥40</b>               | 10.1 (5.2 - 17.7)  | 8.3 (4.9 - 13.2)      | 8.2 (2.7 - 19.1)  | 3.7 (1.0 - 9.4)    | 12.3 (4.9 - 25.3)  | 13.2 (7.2 - 22.1)     |
| <b>Total</b>             | 11.0 (6.9 - 16.6)  | 34.2 (28.3 - 41)      | 9.1 (4.1 - 17.2)  | 10.1 (5.9 - 16.2)  | 12.9 (6.9 - 22.1)  | 58.2 (47.3 - 70.9)    |

<sup>a</sup>Estimates were not provided for strata with 0 reported events. <sup>b</sup>Estimates for mRNA-1273 were not provided for individuals aged 12-17 because this product was not used for this age group in Ontario. NA, not applicable; NR, not reported.

**eFigure 3.** Rate of reported myocarditis and pericarditis per million doses administered following dose 2 of mRNA vaccine for all sexes in Ontario as of September 4, 2021

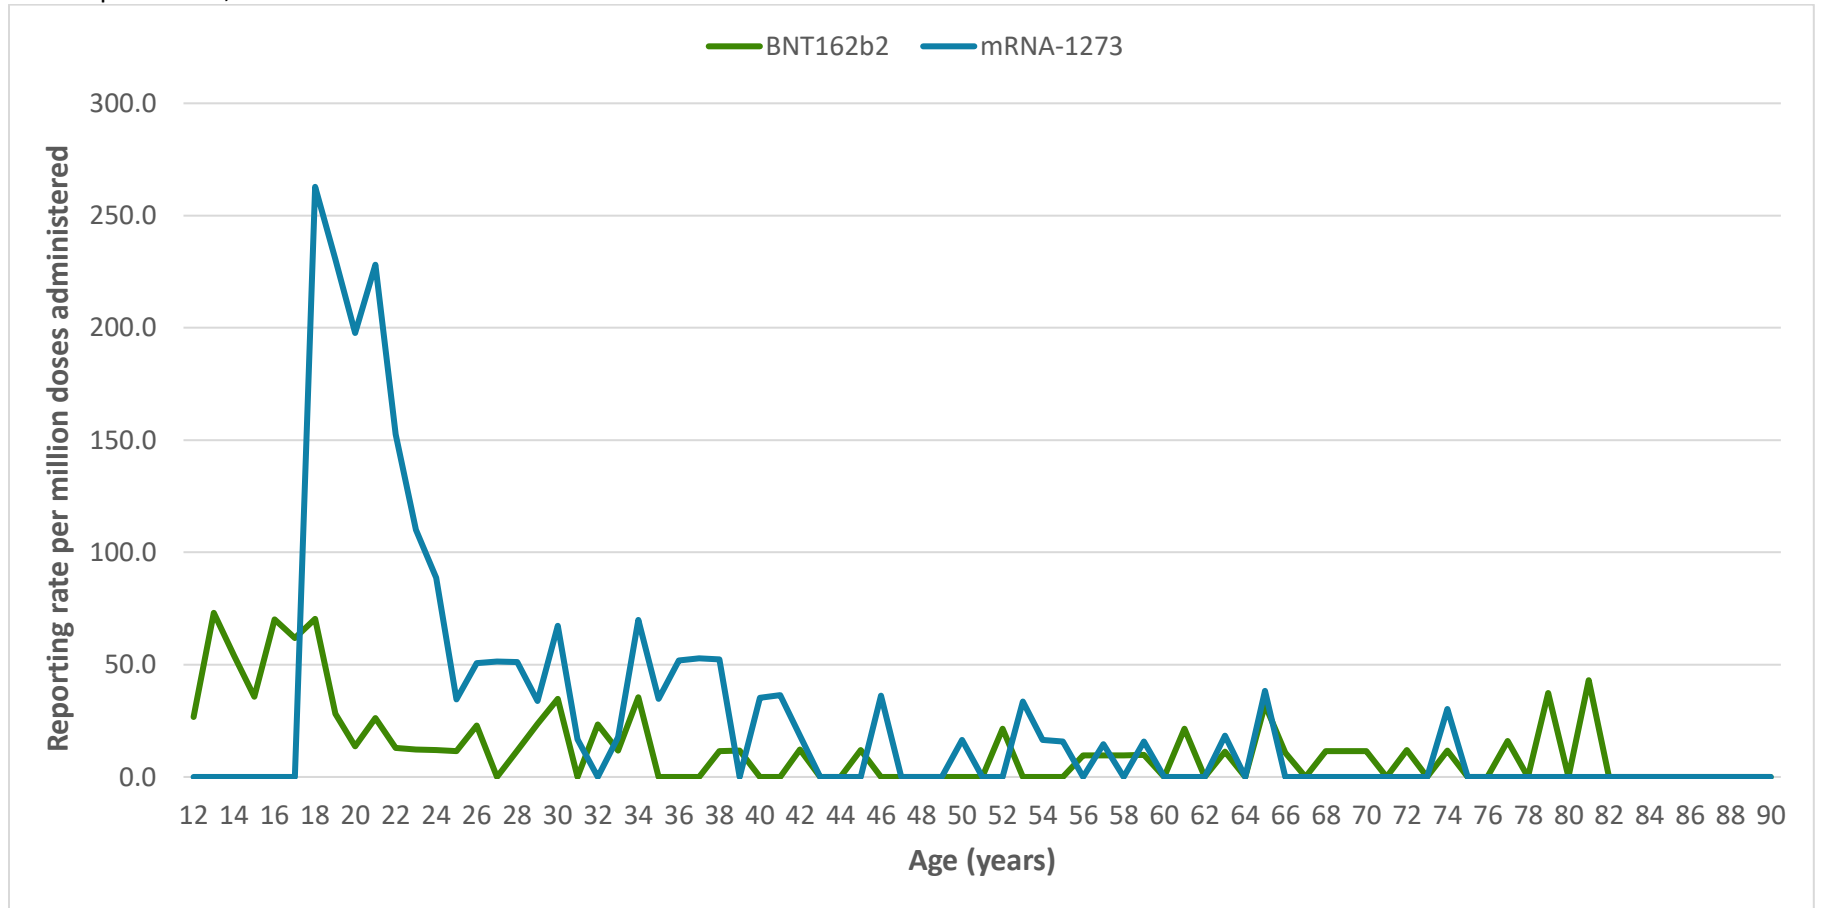

**eTable 4.** Rate<sup>a</sup> of reported myocarditis and pericarditis per million doses administered and 95% CI by dose 2 product and interdose interval, for individuals receiving dose 2 on or after June 1, 2021

| <b>BNT162b2 – Dose 2</b>             |                    |                      |                          |                       |                     |                   |                     |
|--------------------------------------|--------------------|----------------------|--------------------------|-----------------------|---------------------|-------------------|---------------------|
|                                      | Females            | Males                | 12-17 years <sup>c</sup> | 18-24 years           | 25-39 years         | ≥40 years         | OVERALL             |
| <b>Product schedule*<sup>b</sup></b> |                    |                      |                          |                       |                     |                   |                     |
| BNT162b2-<br>BNT162b2                | 5.9 (3.5 - 9.5)    | 25.0 (19.3 - 32.0)   | 53.8 (37.7 - 74.5)       | 26.9 (14.3 - 45.9)    | 13.4 (7.5 - 22.1)   | 5.4 (3.1 - 8.6)   | 14.9 (11.9 - 18.6)  |
| mRNA-1273 –<br>BNT162b2              | NR                 | 14.6 (0.4 - 81.2)    | NA                       | NR                    | NR                  | 12.5 (0.3 - 69.7) | 7.6 (0.2 - 42.3)    |
| <b>Interval (days)</b>               |                    |                      |                          |                       |                     |                   |                     |
| ≤30                                  | 25.8 (8.4 - 60.3)  | 79.3 (44.4 - 130.8)  | 101.9 (55.7 - 170.9)     | 45.3 (5.5 - 163.7)    | 42.5 (11.6 - 108.7) | NR                | 52.1 (31.8 - 80.5)  |
| 31-55                                | 4.1 (1.1 - 10.6)   | 28.2 (18.6 - 41.0)   | 37.7 (21.6 - 61.3)       | 34.7 (15.9 - 66)      | 8.7 (2.8 - 20.3)    | 1.5 (0.0 - 8.3)   | 16.1 (10.9 - 22.8)  |
| ≥56                                  | 4.5 (2.0 - 9.0)    | 15.6 (9.9 - 23.4)    | 55.7 (20.4 - 121.2)      | 10.1 (1.2 - 36.5)     | 12.3 (4.5 - 26.7)   | 6.9 (4.0 - 11.1)  | 9.6 (6.5 - 13.6)    |
| <b>mRNA-1273 – Dose 2</b>            |                    |                      |                          |                       |                     |                   |                     |
|                                      | Females            | Males                | 12-17 years**            | 18-24 years           | 25-39 years         | ≥40 years         | OVERALL             |
| <b>Product schedule</b>              |                    |                      |                          |                       |                     |                   |                     |
| mRNA-1273 -<br>mRNA-1273             | 9.5 (3.8 - 19.6)   | 58.3 (42.4 - 78.3)   | NA                       | 162.0 (108.5 - 232.6) | 30.1 (16.0 - 51.4)  | 10.2 (4.7 - 19.4) | 34.2 (25.4 - 44.9)  |
| BNT162b2 -mRNA-<br>1273              | 13.1 (6.0 - 25.0)  | 72.5 (53.8 - 95.6)   | NA                       | 203.9 (142.0 - 283.6) | 52.0 (32.2 - 79.5)  | 3.8 (0.8 - 11.0)  | 42.9 (32.6 - 55.3)  |
| <b>Interval (days)</b>               |                    |                      |                          |                       |                     |                   |                     |
| ≤30                                  | 36.2 (7.5 - 105.8) | 125.7 (64.9 - 219.5) | NA                       | 353.1 (182.4 - 616.8) | 39.5 (8.1 - 115.4)  | NR                | 83.9 (47.0 - 138.4) |
| 31-55                                | 9.4 (3.5 - 20.5)   | 96.0 (74.4 - 121.9)  | NA                       | 184.0 (133.7 - 247.0) | 45.0 (29.1 - 66.4)  | 7.4 (2.0 - 19.0)  | 54.6 (42.8 - 68.7)  |
| ≥56                                  | 10.0 (4.0 - 20.6)  | 23.1 (12.9 - 38.0)   | NA                       | 103.2 (44.5 - 203.3)  | 29.4 (10.8 - 64)    | 7.5 (3.2 - 14.7)  | 16.2 (10.2 - 24.6)  |

<sup>a</sup>Estimates were not provided for strata with 0 reported events. <sup>b</sup>There were 5 reports following ChAdOx1-mRNA-1273 among 350,628 doses administered and 5 reports following ChAdOx1-BNT162b2 among 279,805 doses administered. These are excluded from Table 5. <sup>c</sup>Estimates for mRNA-1273 were not provided for individuals aged 12-17 because this product was not used for this age group in Ontario. NA, not applicable; NR, not reported.



**eTable 5.** Rates<sup>a</sup> of reported myocarditis and pericarditis per million doses administered and 95% CI among males aged 18-24 years by vaccine product and interdose interval with dose 2 on or after June 1, 2021

| Vaccine schedule      | Reports (N) | Doses administered (N) | Reported rate (95% CI) per million doses |
|-----------------------|-------------|------------------------|------------------------------------------|
| People with two doses |             |                        |                                          |
| Homologous schedule   |             |                        |                                          |
| BNT162b2-BNT162b2     | 11          | 235,819                | 46.6 (23.3 – 83.5)                       |
| Interval ≤30 days     | 2           | 21,160                 | 94.5 (11.4 – 341.4)                      |
| Interval 31-55 days   | 8           | 124,235                | 64.4 (27.8 – 126.9)                      |
| Interval ≥56 days     | 1           | 90,424                 | 11.1 (0.3 – 61.6)                        |
| mRNA-1273-mRNA-1273   | 27          | 93,616                 | 288.4 (190.1 – 419.6)                    |
| Interval ≤30 days     | 4           | 10,623                 | 376.5 (102.6 – 964.1)                    |
| Interval 31-55 days   | 20          | 60,352                 | 331.4 (202.4 – 511.8)                    |
| Interval ≥56 days     | 3           | 22,641                 | 132.5 (27.3 – 387.2)                     |
| Heterologous schedule |             |                        |                                          |
| mRNA-1273-BNT162b2    | 0           | 8,853                  | NR                                       |
| Interval ≤30 days     | 0           | 1,058                  | NR                                       |
| Interval 31-55 days   | 0           | 5,402                  | NR                                       |
| Interval ≥56 days     | 0           | 2,393                  | NR                                       |
| BNT162b2-mRNA-1273    | 29          | 85,893                 | 337.6 (226.1 - 484.9)                    |
| Interval ≤30 days     | 6           | 7,720                  | 777.2 (285.2 - 1691.6)                   |
| Interval 31-55 days   | 20          | 62,717                 | 318.9 (194.8 - 492.5)                    |
| Interval ≥56 days     | 3           | 15,456                 | 194.1 (40.0 - 567.2)                     |

<sup>a</sup> Estimates were not provided for strata with 0 reported events. NR, not reported.
